# Supplementary material for: UBB pseudogene 4 encodes functional ubiquitin variants
Source: PubMed Central journal article supplement (PMC7066184; doi:10.1038/s41467-020-15090-6), 2020-03-11
Supplement: 41467_2020_15090_MOESM1_ESM.pdf [file 41467_2020_15090_MOESM1_ESM.pdf]

## **UBB Pseudogene 4 encodes functional ubiquitin variants**

Dubois et al.

# Supplementary Figure 1

## RNA-Seq of 16 human tissues (Illumina Body Map)

Expression level in FPKM  
0 558

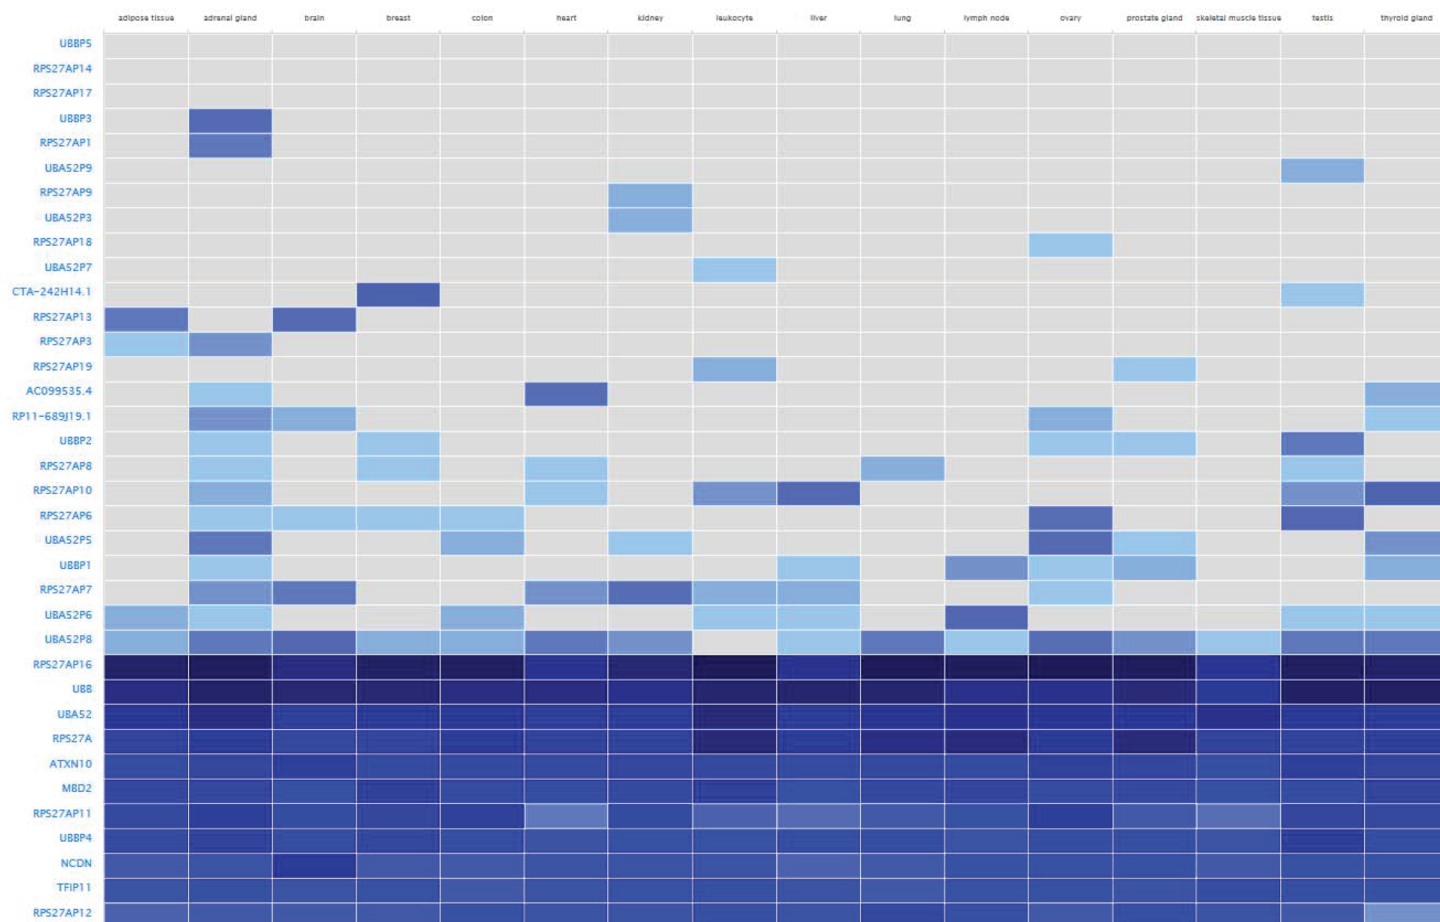

### Supplementary Figure 1: Evidence of UBBP4 expression from Illumina Body Map.

Expression levels analysis of *UBBP4* through RNASeq data available through the Illumina Body Map from 16 different tissues of all ubiquitin encoding genes and pseudogenes. Expression levels are shown in FPKM.



## Supplementary Figure 2

### RNA-Seq of 53 human tissues (Genotype-Tissue Expression Project (GTEx))

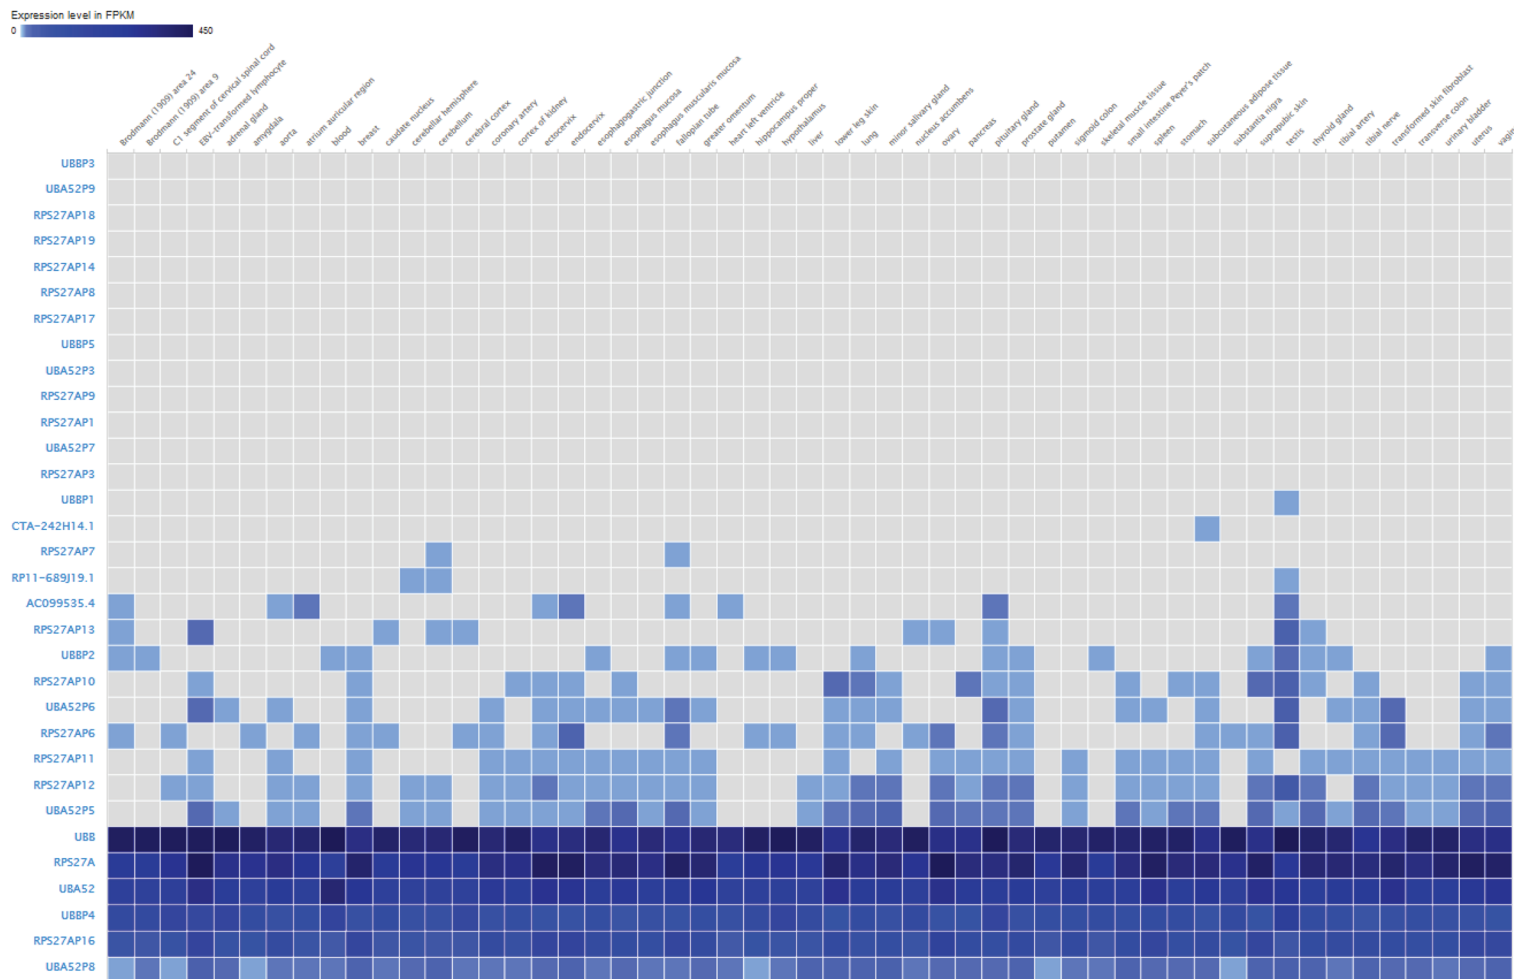

### Supplementary Figure 2: Evidence of *UBBP4* expression from the Genotype-Tissue Expression Project (GTEx).

Expression levels analysis of *UBBP4* through RNASeq data available through the GTEx Portal from 53 different tissues of all ubiquitin encoding genes and pseudogenes. Expression levels are shown in FPKM.

## Supplementary Figure 3

### RNAseq expression from NIH Consortium

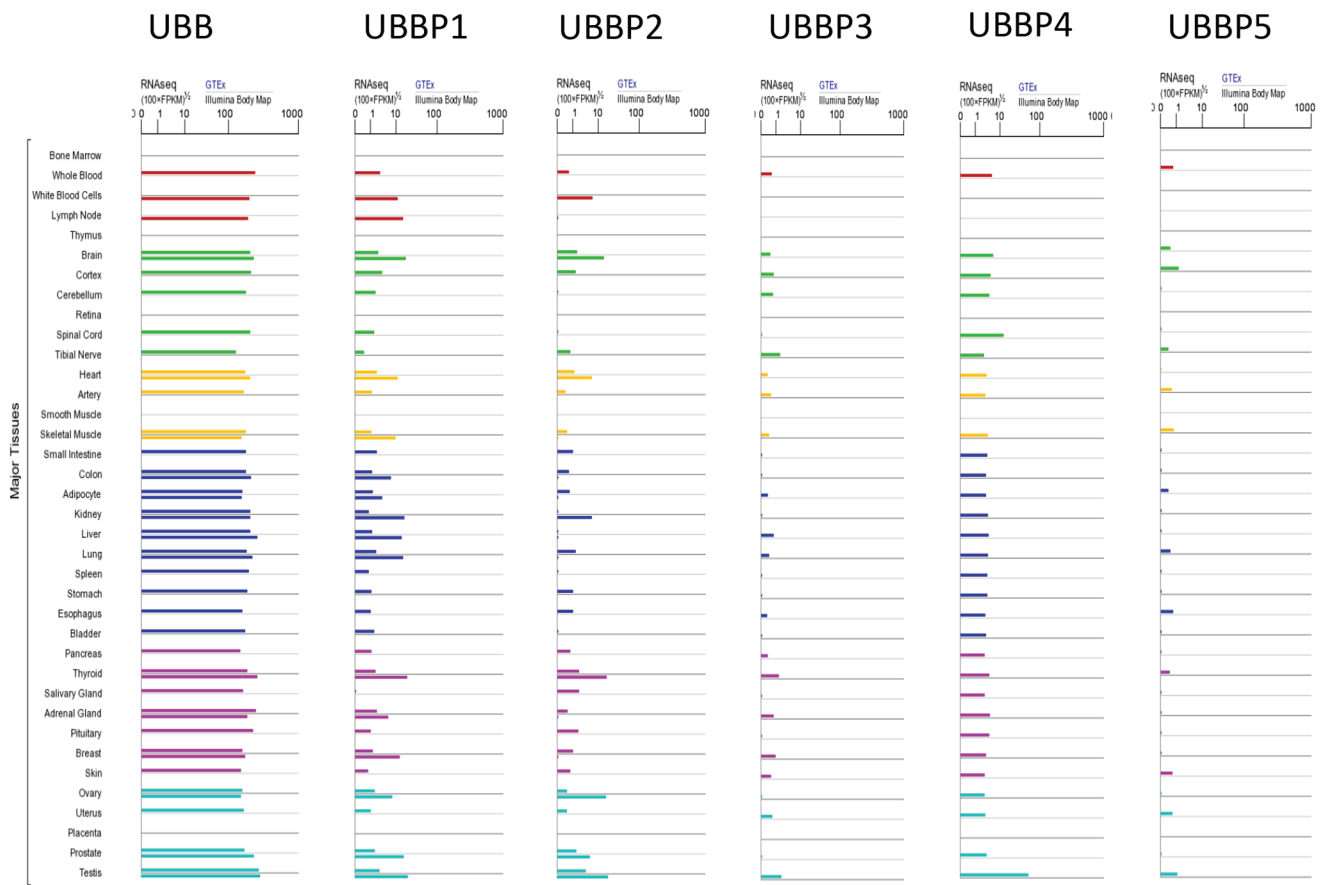

Data presented in GeneCards –NIH Consortium

### Supplementary Figure 3: Evidence of UBBP4 expression from the NIH Consortium.

Expression levels analysis of *UBBP4* through RNASeq data available through the NIH Consortium and available through Genecards from 37 different major tissues of all ubiquitin encoding genes and pseudogenes. Expression levels are shown in FPKM.

## Supplementary Figure 4

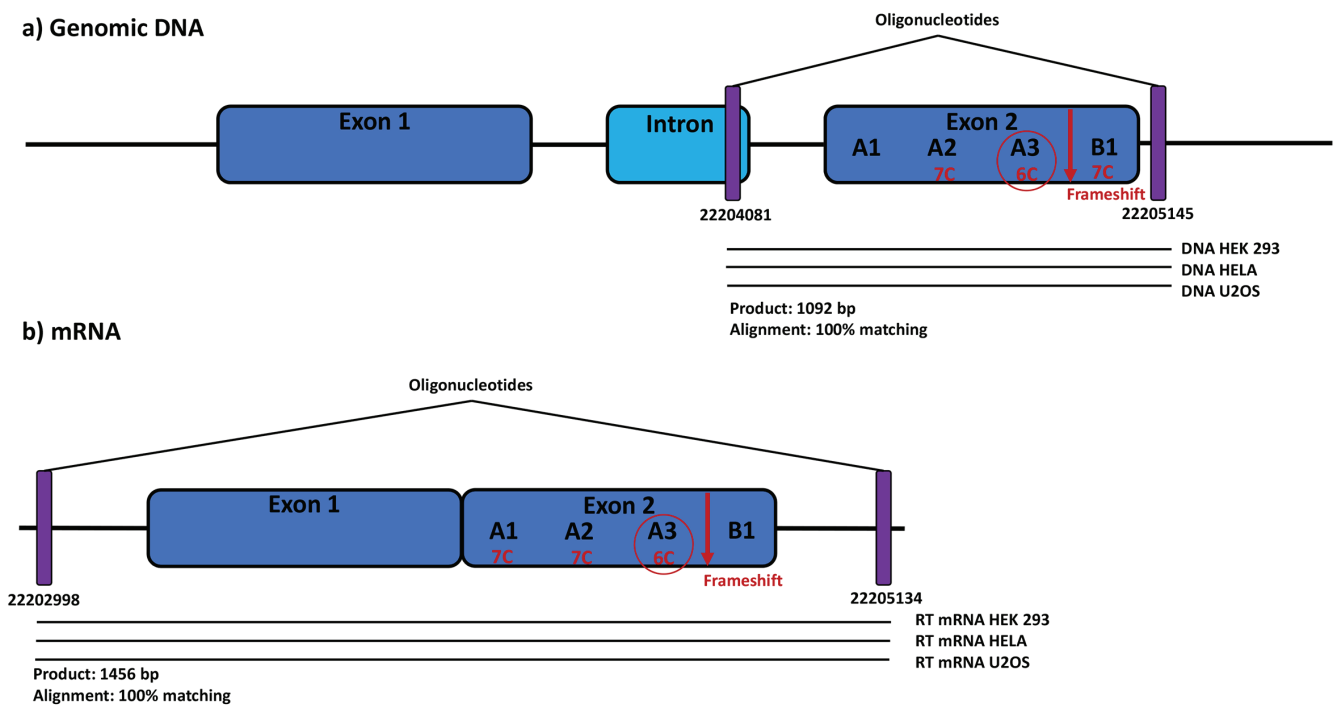

### Supplementary Figure 4: Sequencing of UBBP4 genomic DNA and mRNA in HEK293, HeLa and U2OS cells.

**a)** Genomic DNA was extracted from HEK293, U2OS or HeLa cells. The genomic DNA specific to *UBBP4* was amplified by PCR using a first oligonucleotide within the intron, and a second oligonucleotide 3' of the exon 2 within the non-coding genomic region. **b)** RNA was isolated from HEK293, U2OS or HeLa cells. The isolated RNA was reverse transcribed using an oligo-dT. The reverse transcribed mRNA including both exons was amplified using oligonucleotides from the 5' to the 3' untranslated regions of the mRNA. Following PCR amplification of genomic DNA or reverse-transcribed RNA, the products were cloned into pUC19. A blue-white colony selection with X-galactosidase was performed, and ten clones for each cell line were then sequenced. All sequences were identical, and revealed the absence of the stop codon that was initially reported<sup>1</sup>.

## Supplementary Figure 5

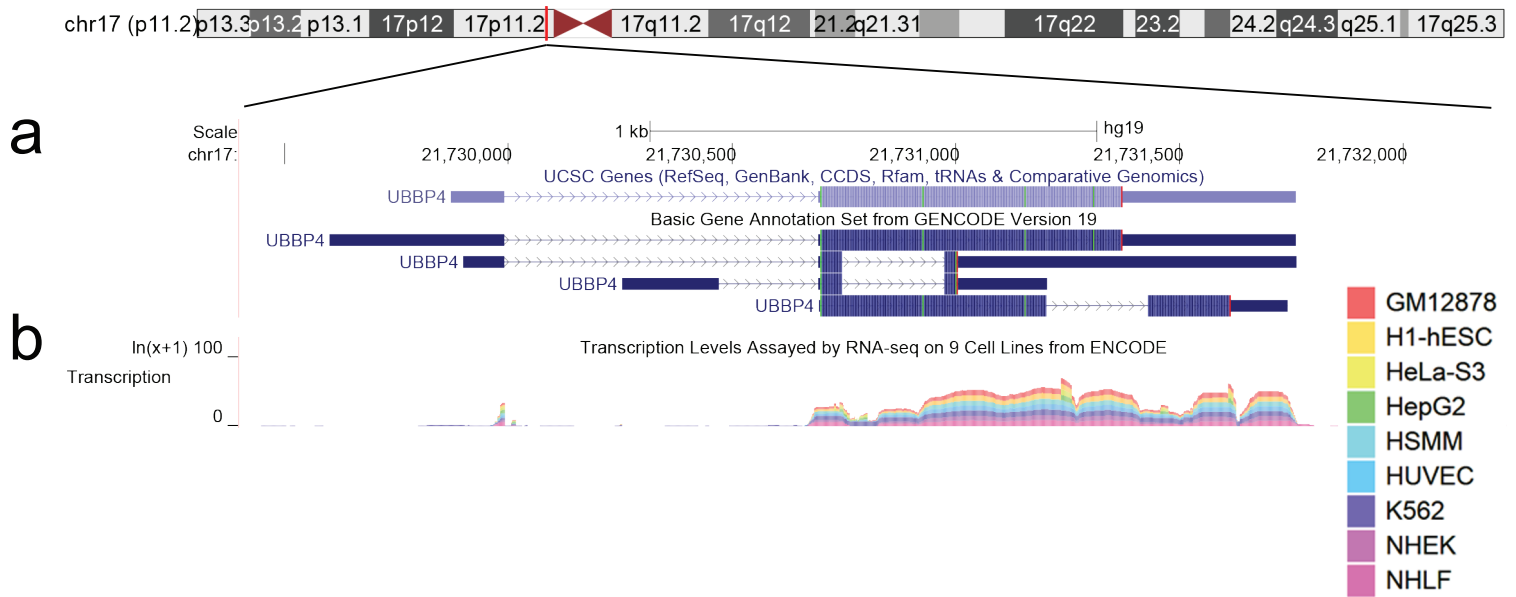

### Supplementary Figure 5: Evidence of *UBBP4* mRNA expression in nine different cell lines from ENCODE.

**a)** Localization of *UBBP4* genomic sequences on Chr 17. **b)** Analysis of RNA-Seq data from ENCODE indicates transcription covering both exons of the *UBBP4* gene. Colours indicate nine different cell lines (GM12878, H1-hESC, HeLa-S3, HepG2, HSMM, HUVEC, K562, NHEK and NHLF).

## Supplementary Figure 6

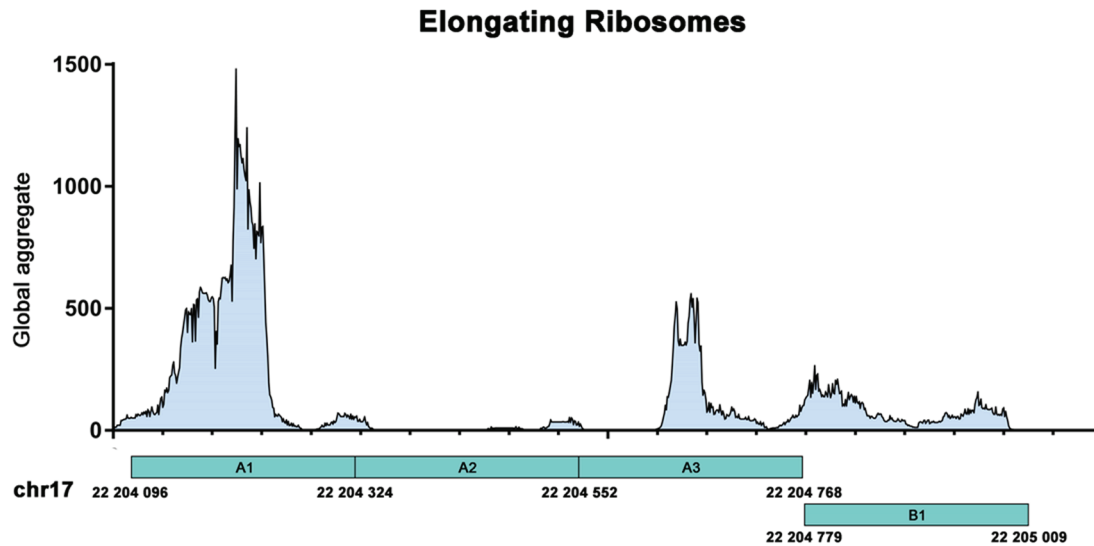

### Supplementary Figure 6: Evidence of UBBP4 translation.

Ribosome profiling uses high throughput sequencing to identify mRNA fragments that are protected by elongating ribosomes. The presence of ribosomes on the mRNA of *UBBP4* from ribosome profiling databases (GWIPS-viz) identifies reads throughout both *UBBP4* reading frames, covering *Ubbp4*<sup>A1</sup>, <sup>A2</sup>, <sup>A3</sup> and <sup>B1</sup>.

## Supplementary Figure 7

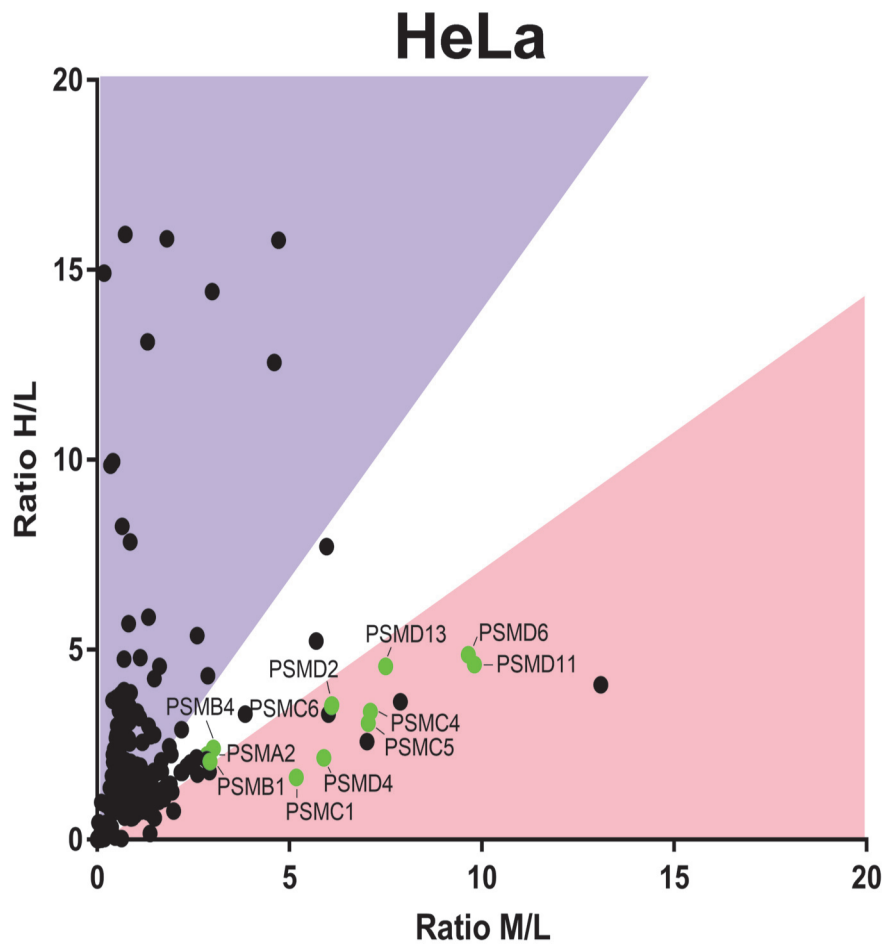

### Supplementary Figure 7: Identification of proteins interacting with Ub and Ub<sup>KEKS</sup>

SILAC-labelled HeLa cells were transfected with empty vector (pcDNA, light), HA-Ub (medium) or HA-Ub<sup>KEKS</sup> (heavy) and lysed under non-denaturing conditions. Following identification and quantification by mass spectrometry, the average ratios identify proteins co-immunoprecipitating with Ub (M/L) or Ub<sup>KEKS</sup> (H/L). Subunits of the proteasome are shown in green.

## Supplementary Figure 8

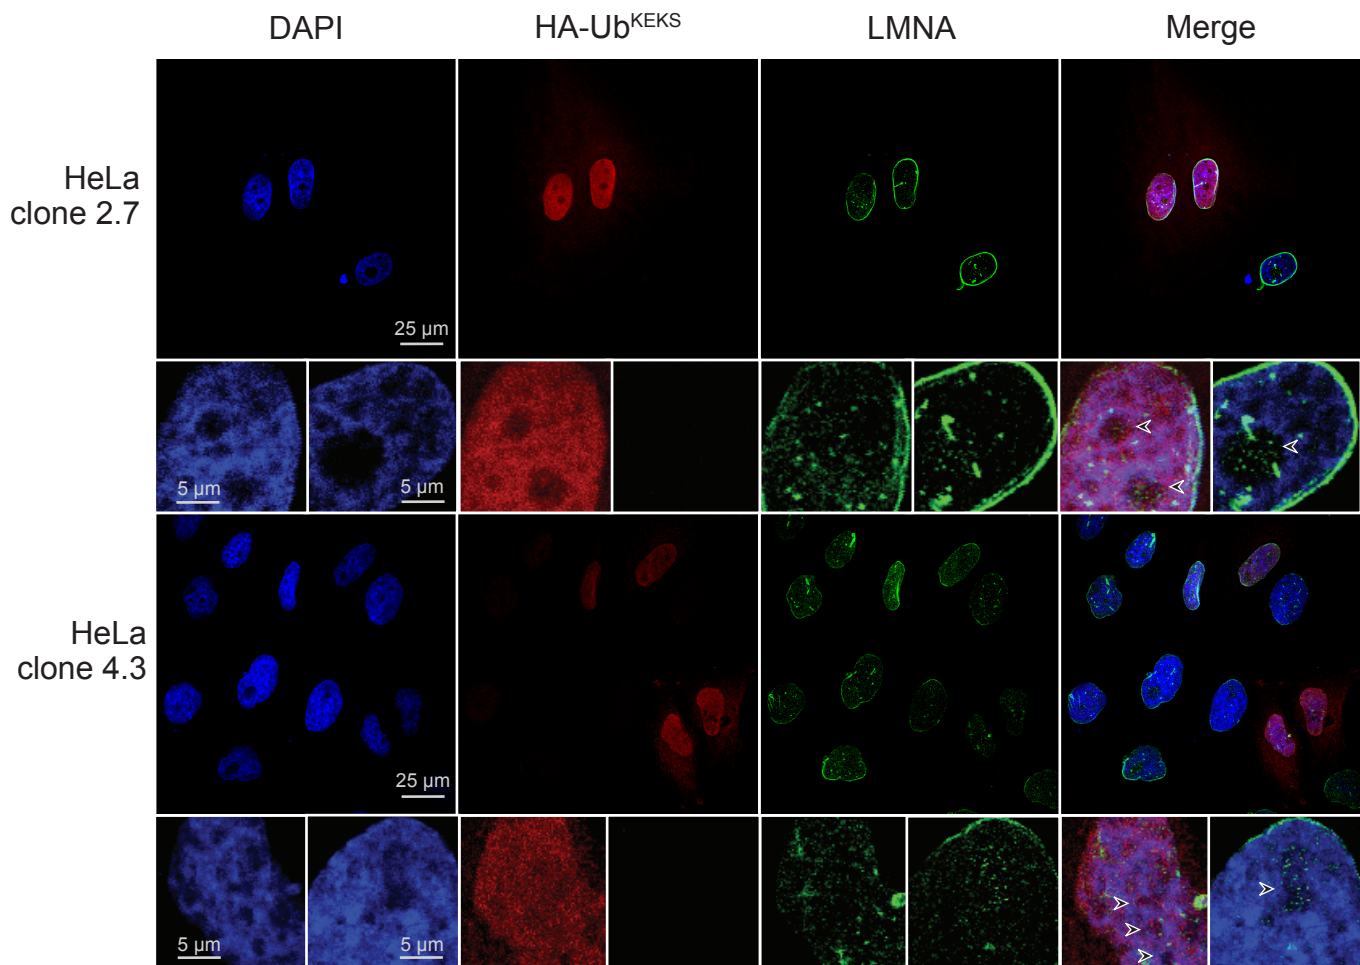

**Supplementary Figure 8: Lamin A nucleolar localization was rescued in HeLa Ub<sup>KEKS</sup> KO cells (clone 4.3 and 2.7) with transient transfection of HA-Ub<sup>KEKS</sup>.**

HeLa cells KO for Ub<sup>KEKS</sup> (clones 2.7 and 4.3) were transfected with a plasmid encoding HA-tagged Ub<sup>KEKS</sup>. 72 hours post-transfection, cells were fixed and labelled for immunofluorescence microscopy with a HA antibody (red), or a Lamin A antibody (green). The nuclei were stained with DAPI (n=3 independent experiments).

# Supplementary Figure 9

a) Product ion intensities of Ub peptide

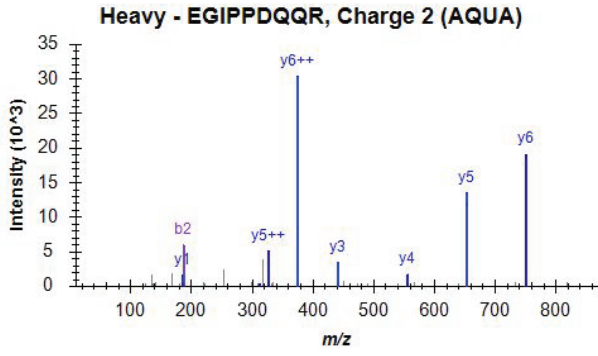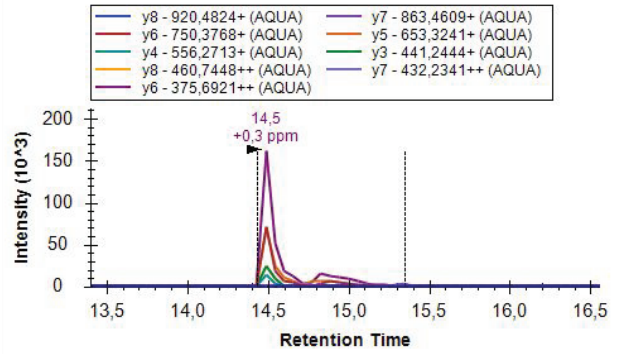

Product ion intensities of Ub<sup>KEKS</sup> peptide

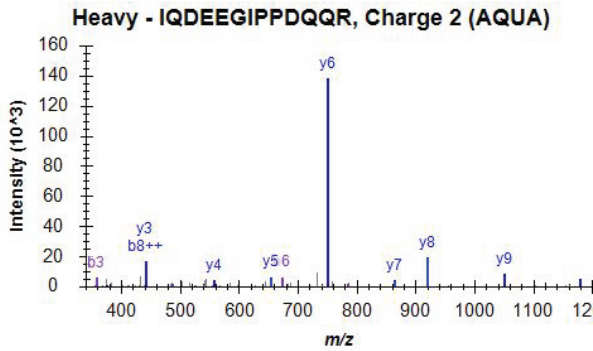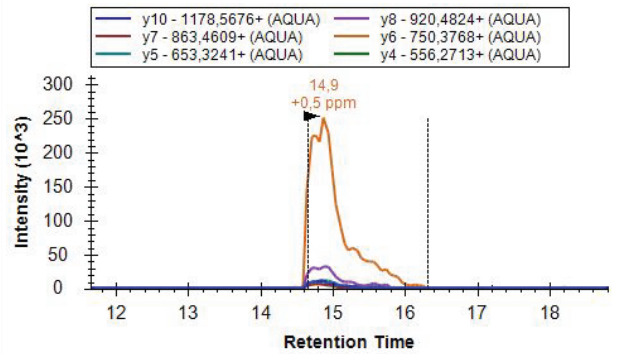

b)

Ub<sup>KEKS</sup> heavy peptide alone

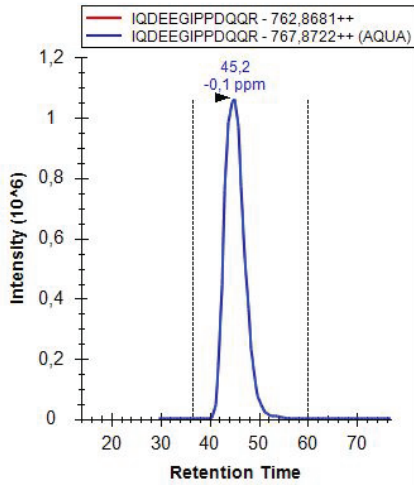

Hela WT

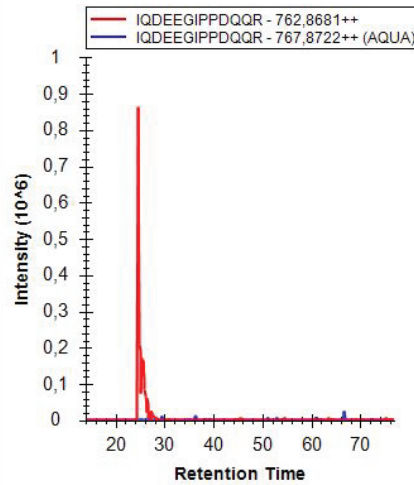

Hela WT with HA-Ub<sup>KEKS</sup> overexpression

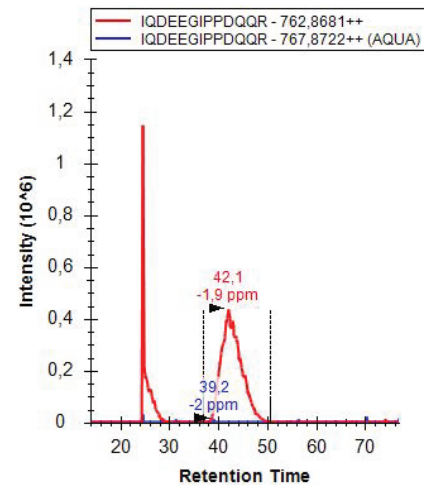

c) Ub<sup>KEKS</sup> peptides identified in LMNA pulldown assay

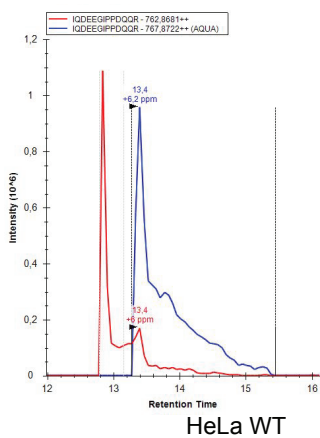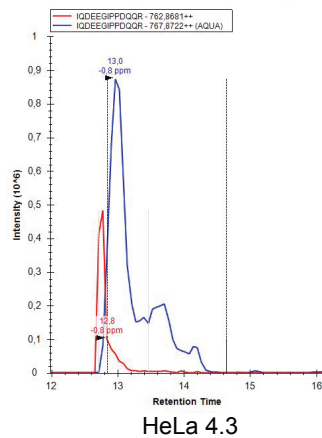

Ub<sup>KEKS</sup> peptides identified in LMNB2 pulldown assay

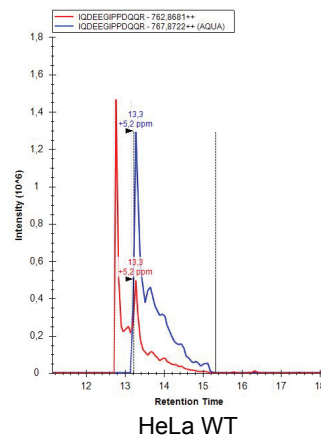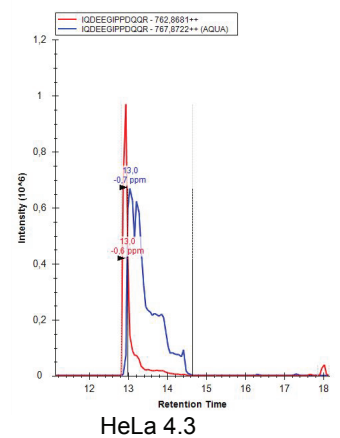



**Supplementary Figure 9: Optimization of Ub and Ub<sup>KEKS</sup> quantification and detection of Ub<sup>KEKS</sup> peak.**

a) Product ion intensities of Ub and Ub<sup>KEKS</sup> peptides (m/z and retention times). The most intense ion for Ub y6<sup>++</sup> and for Ub<sup>KEKS</sup> y6<sup>+</sup> were selected to be used for quantification. b) Ub<sup>KEKS</sup> peak identification test using a 50cm column with a 120min run. Runs were performed using Ub<sup>KEKS</sup> heavy peptide alone, HeLa total cell extract or HeLa overexpressed total cell extract (cells were transfected with HA-Ub<sup>KEKS</sup> plasmid for 48h). Retention times of the heavy peptide and the two different peaks coming from the HeLa or HeLa overexpressed cells were compared and the peak present only in transfected cells was confirmed to be the peak corresponding to Ub<sup>KEKS</sup> light peptides. The peak eluting before was regarded as non-specific signal. c) Chromatogram Ub<sup>KEKS</sup> in WT and Ub<sup>KEKS</sup> KO (clone 4.3) HeLa cells in LMNA and LMNB2 pulldown assays. Blue line represents heavy (AQUA) peptide, red line represents endogenous peptides with m/z values indicated in the box above chromatograms. Dotted lines indicate peak boundaries with black arrows showing peaks. Peak values with mass error are indicated above each peak. Within peak boundaries the highest measured value for both heavy and light peptides were recorded. However, due to the limitations of this type of measurement peak trailing appearing from the non-specific signal bleeding into the measurement area corresponded to recorded values even in the absence of a real peak.

## Supplementary Figure 10

a) Ub<sup>KEKS</sup> peptides identified in total cell extracts

— IQDEEGIPPDQQR - 762,8681++  
— IQDEEGIPPDQQR - 767,8722++ (AQUA)

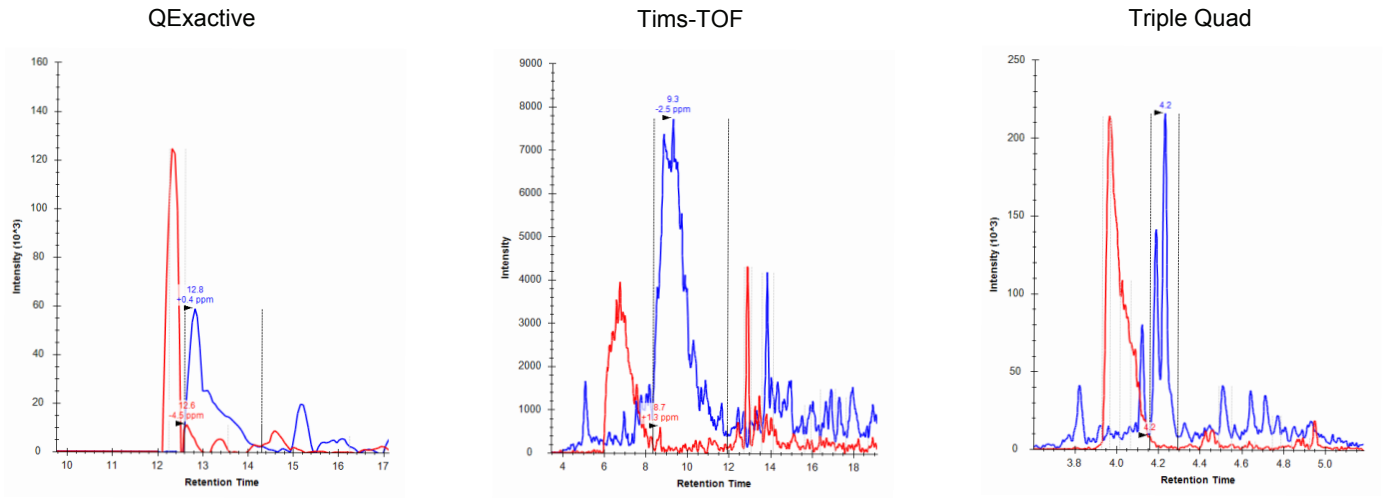

b) Ub peptides identified in total cell extracts

— EGIPPDQQR - 520,2620++  
— EGIPPDQQR - 525,2661++ (AQUA)

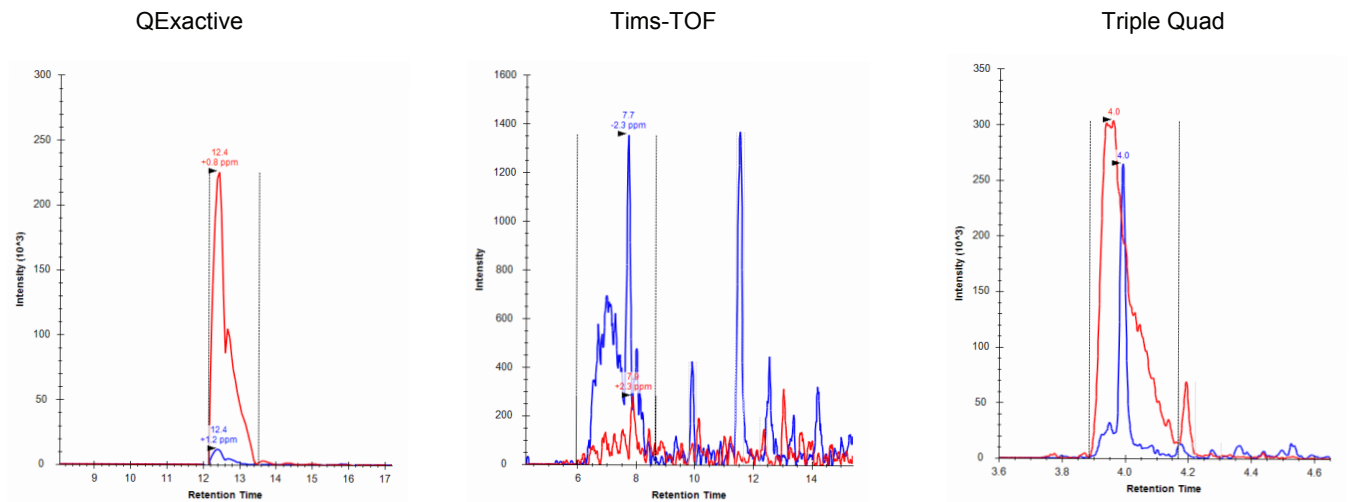

### Supplementary Figure 10: Absolute quantification of Ub and Ub<sup>KEKS</sup> in total cell extracts.

**a-b)** Exponentially growing HeLa WT were harvested and lysed. Following tryptic digestion, the Heavy Arginine (U-13C<sub>6</sub>, 15N<sub>4</sub>; mass difference: +10 Da) labelled AQUA Ub (EGIPPDQQR) and Ub<sup>KEKS</sup> (IQDEEGIPPDQQR) peptides were spiked into the samples at a final concentration of 1.66 fmol/ $\mu$ l. The peptides were analysed by mass spectrometers using a PRM method with an inclusion list containing the  $m/z$  values corresponding to the monoisotopic form of the heavy and light peptides of Ub (520.2/ 525.2) and Ub<sup>KEKS</sup> (762.8/ 767.8). For quantification, the most intense fragment ion ( $y_6$ ) was used for both peptides. The analysis were performed on an Orbitrap QExactive (Thermo Fisher), a TimsTOF Pro (Bruker Daltonics) and a LCMS-8060 (Shimadzu). The quantification using SkyLine is presented in Supplementary Table 4.

## Supplementary Figure 11

a

| altprot_accession | Pseudogene           | single pep | reads_tis | gene_symbol    | transcript_accession | Motif-RGG |
|-------------------|----------------------|------------|-----------|----------------|----------------------|-----------|
| IP_634590.1       |                      | 0          | 0         | AC008072.1     | ENST00000434254      |           |
| IP_639873.1       | RPS27A pseudogene 7  | 2          | 0         | AC079807.3     | ENST00000422792      |           |
| IP_584271.1       |                      | 1          | 0         | CTA-242H14.1   | ENST00000466070      |           |
| IP_602299.1       | RPS27A pseudogene 10 | 1          | 0         | CTD-2024I7.1   | ENST00000496103      |           |
| IP_689793.1       | RPS27A pseudogene 19 | 1          | 0         | CTD-3214H19.12 | ENST00000597285      | RGG       |
| IP_592206.1       | RPS27A pseudogene 11 | 1          | 0         | RP11-367G18.2  | ENST00000402798      | RGG       |
| IP_592206.1       | RPS27A pseudogene 11 | 1          | 0         | RP11-367G18.2  | ENST00000402798      | RGG       |
| IP_722705.1       | RPS27A pseudogene 16 | 0          | 235       | RP11-51O6.1    | ENST00000492222      |           |
| IP_750298.1       | UBA52 pseudogene 2   | 0          | 0         | RP11-689J19.1  | ENST00000480068      |           |
| IP_710165.1       |                      | 0          | 0         | RP11-963H4.2   | ENST00000478739      |           |
| IP_761918.1       |                      | 2          | 0         | RP3-432I18.1   | ENST00000546846      |           |
| IP_579682.1       | UBA52 pseudogene 12  | 0          | 0         | RP4-814D15.2   | ENST00000429552      |           |
| IP_713422.1       | RPS27A pseudogene 1  | 0          | 237       | RPS27AP1       | ENST00000475545      | RGG       |
| IP_663056.1       | RPS27A pseudogene 2  | 0          | 0         | RPS27AP2       | ENST00000457576      |           |
| IP_662482.1       | RPS27A pseudogene 3  | 0          | 0         | RPS27AP3       | ENST00000453803      |           |
| IP_564850.1       | UBA52 pseudogene 6   | 2          | 0         | UBA52P6        | ENST00000399822      | RGG       |
| IP_723668.1       | UBA52 pseudogene 8   | 0          | 0         | UBA52P8        | ENST00000498379      |           |
| IP_636378.1       | UBB pseudogene 1     | 0          | 448       | UBBP1          | ENST00000392399      |           |
| IP_636379.1       | UBB pseudogene 1     | 0          | 142       | UBBP1          | ENST00000392399      |           |
| IP_668239.1       | UBB pseudogene 2     | 0          | 442       | UBBP2          | ENST00000376781      |           |
| IP_636103.1       | UBB pseudogene 3     | 0          | 0         | UBBP3          | ENST00000445497      | RGG       |

b

|           | 10            | 20             | 30            | 40     | 50            | 60            | 70      |
|-----------|---------------|----------------|---------------|--------|---------------|---------------|---------|
| Ubiquitin | MQIFVKTLTGKTI | ITLVEVPSDTI    | ENVKAKIQDKEG  | IPDQQR | IFAGKQLEDGRTL | SDYNIQKESTL   | LHLVLR  |
| UBBP4_A1  | MRIFVKTLTGKI  | ITLVEVPSATI    | ENVKAKIQDKEGN | PCDQQR | IFAGKQREDGR   | SLSDYNIQKESTL | LHLVLR  |
| UBBP4_B1  | MKIFVKTLTGKTI | ITLVEVPSDTI    | ENVKAKIQDEEG  | IPDQQR | IFAGKQLEDGRTL | SDYSIQKESTL   | LHLVLR  |
| UBBP3     | MQIFLKTLTGKTI | ITLVEVPSDIL    | QNVKAKIHVKEG  | IPDQHS | IFVKGQLEDGCT  | VCDYNIQKESAL  | LHLVLR  |
| UBA52P6   | MQIFVKTLTGKTI | ITLVEVPSDTI    | ENVSAKIQDKEG  | IPDKQR | IFASKQLEDGRTL | SDYNVQKQPT    | PHLVL   |
| RPS27AP1  | MQIFVKTLTGKTI | ITLKVPELDTI    | ENVKAQIQDKEG  | IPDQQR | IFAGKQLEDGCT  | LSGYNIQKESTL  | LHFLVLR |
| RPS27AP11 | MQIFLKTLTGKTI | ITLVAEPLDTI    | ENVKAKIQDKEG  | IPDQQR | IFAGKQLEDGCT  | LSYNIQKESTL   | LHLVLR  |
| RPS27AP19 | -----         | MVENVKAKIQGKER | IPDQQR        | -----  | QALEDGRTL     | SDYNIQKESPL   | LHLVLR  |

### Supplementary Figure 11: Several ubiquitin variants are produced from ubiquitin pseudogenes.

**a)** Large scale proteomic experiments and ribosome profiling uncovers evidence at the protein level for several ubiquitin pseudogenes producing different ubiquitin variants<sup>2</sup>. Altprot\_accession: in the OpenProt proteogenomic resource<sup>2</sup>, novel alternative proteins, including those coded by pseudogenes are given IP\_accession numbers. Single pep: number of peptides unique (i.e. specific) for the protein coded by the corresponding pseudogene. Reads\_tis: ribosome profiling reads at the translation initiation site. **b)** The human ubiquitin variants ending with a di-glycine at the C-terminus are compared for their amino acid sequences.

# Supplementary Figure 12. Full scan of western blots with molecular weight

Figure 2c

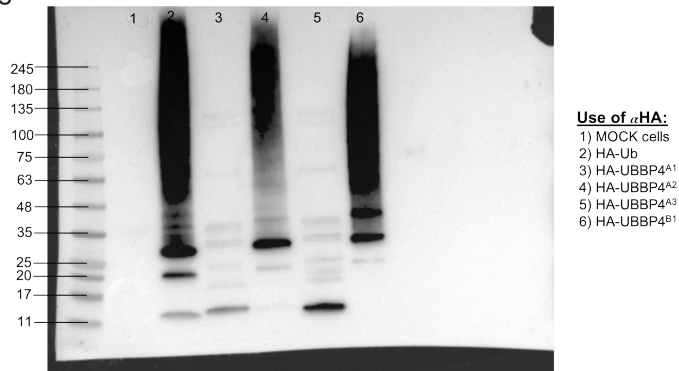

Figure 2d

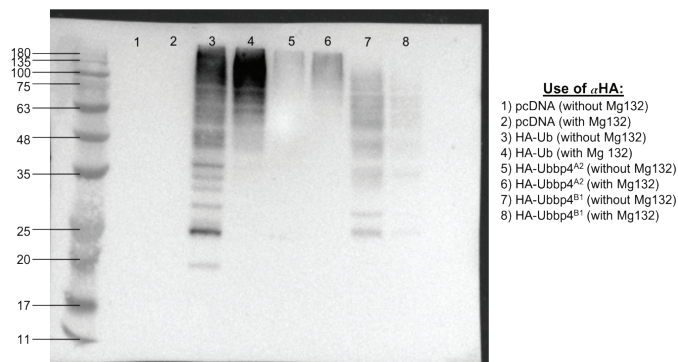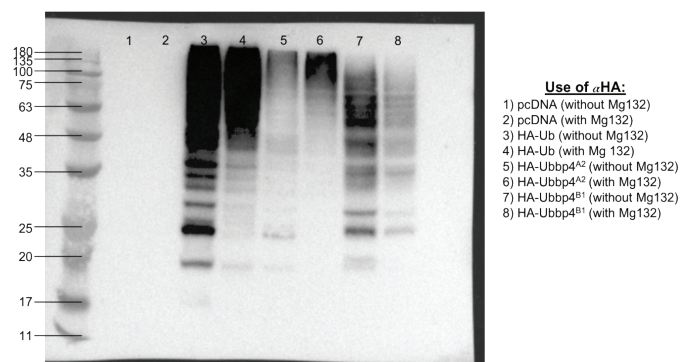

Figure 3a

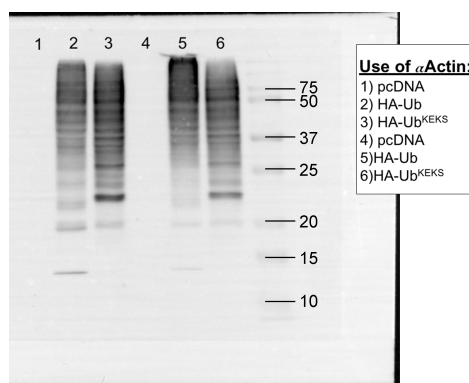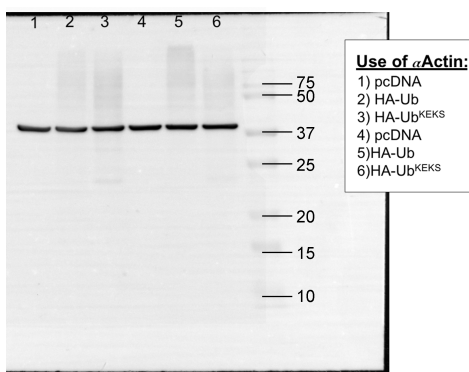

Figure 4a

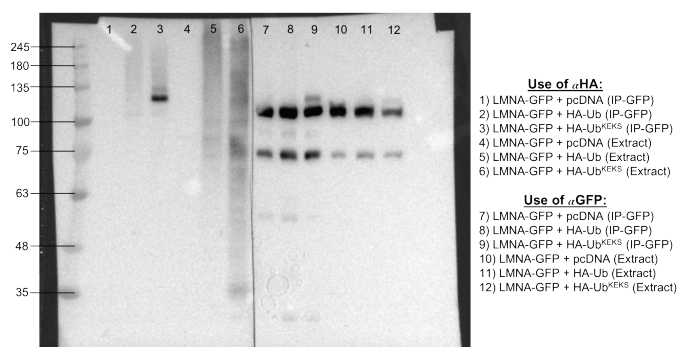

Figure 4b

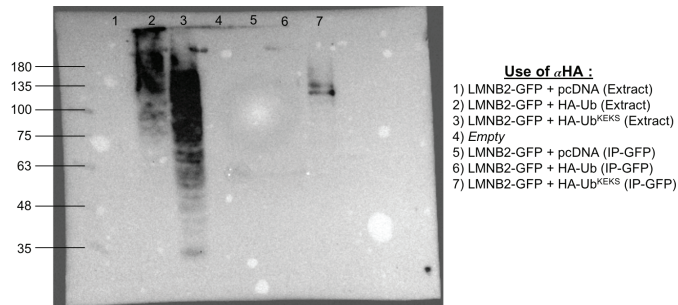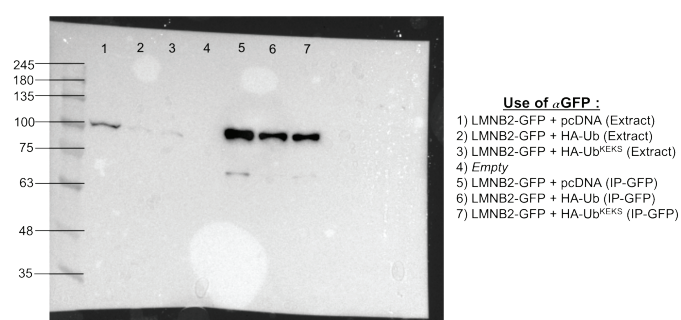

**Supplementary Table 1.** Overview of human ubiquitin-coding genes and their pseudogenes

| Human | Ubiquitin-coding genes | RPS27A    | UBA52   | UBB   | UBC          |    |
|-------|------------------------|-----------|---------|-------|--------------|----|
|       |                        |           |         |       |              |    |
|       | Annotated Pseudogenes  | RPS27AP1  | UBA52P1 | UBBP1 | AL596327.1   |    |
|       |                        | RPS27AP2  | UBA52P2 | UBBP2 | AC108676.2   |    |
|       |                        | RPS27AP3  | UBA52P3 | UBBP3 |              |    |
|       |                        | RPS27AP4  | UBA52P4 | UBBP4 |              |    |
|       |                        | RPS27AP5  | UBA52P5 | UBBP5 |              |    |
|       |                        | RPS27AP6  | UBA52P6 |       |              |    |
|       |                        | RPS27AP7  | UBA52P7 |       |              |    |
|       |                        | RPS27AP8  | UBA52P8 |       |              |    |
|       |                        | RPS27AP9  | UBA52P9 |       |              |    |
|       |                        | RPS27AP10 |         |       |              |    |
|       |                        | RPS27AP11 |         |       |              |    |
|       |                        | RPS27AP12 |         |       |              |    |
|       |                        | RPS27AP13 |         |       |              |    |
|       |                        | RPS27AP14 |         |       |              |    |
|       |                        | RPS27AP15 |         |       |              |    |
|       |                        | RPS27AP16 |         |       |              |    |
|       |                        | RPS27AP17 |         |       |              |    |
|       |                        | RPS27AP18 |         |       |              |    |
|       |                        | RPS27AP19 |         |       |              |    |
|       |                        |           |         |       |              |    |
|       |                        |           |         |       | <b>Total</b> |    |
|       | Number of pseudogenes  | 17        | 6       | 5     | 2            | 52 |

## Supplementary Table 2. Oligonucleotides used in this study

### UBBP4 CRISPR/Cas Oligonucleotides

| sgRNA | target sequence      | Top oligo (5'-3')        | Bottom oligo (5'-3')     |
|-------|----------------------|--------------------------|--------------------------|
| #30   | GCAGAGCGCAAATTTGTGCA | CACCGCAGAGCGCAAATTTGTGCA | AAACTGCACAAATTTGCCTCTGC  |
| #12   | GCAATCCCTGTGACCAGCAG | CACCGCAATCCCTGTGACCAGCAG | AAACTGCTGGTCCACAGGGATTGC |
| #5    | GCAGGCAAGAAGTTGGAAGA | CACCGCAGGCAAGAAGTTGGAAGA | AAACTCTCAACTTCTTGCCTGC   |

### gblock oligonucleotides

|                       |                                                                                                                                                                                                                                                                                                                           |
|-----------------------|---------------------------------------------------------------------------------------------------------------------------------------------------------------------------------------------------------------------------------------------------------------------------------------------------------------------------|
| HA-Ub                 | GACTCGAGATGGGCTACCCCTATGATGTGCCTGACTACGCAGATCTCAATGGTGGTGGTGGGTCGACCATGCAGATCTTCGTGAAGACCCTGACTGGTAAGACCATCACTCTCGAAGTGG<br>AGCCGAGTGACACCATTTGAGAATGTCAAGGCAAAGATCCAAGACAAGGAAGGCATCCCTCTGACCAGCAGAGTTGATCTTTGCTGGGAAACAGCTGGAAGATGGACGCACCCTGTCTGAC<br>TACAACATCCAGAAAGAGTCCACCCTGCACCTGGTCTCCGTCTCAGAGGTGGTTGAGGATCCGA |
| HA-Ub <sup>KEKS</sup> | GACTCGAGATGGGCTACCCCTATGATGTGCCTGACTACGCAGATCTCAATGGTGGTGGTGGGTCGACCATGAAGATCTTCGTGAAGACCCTGACTGGAAAGACCATCACCTGGAGGTGG<br>AGCCCAAGTGACACCATCGAAAATGTGAAAGCCAAGATCCAGGATGAAGAAGGCATCCCCCGATCAGCAGAGGCTCATCTTTGCAAGCAAGAAGTTGGAAGATGGCCGCCTCTTCTGACT<br>ACAGCATCCAGAAAGAGTCCACCCTGCACCTGGTCTCGCCCTGAGGGTGGCTGTTAAGGATCCGA  |

### Oligonucleotides for PCR

| Genes | Forward primer                                   | Reverse primer                                         |
|-------|--------------------------------------------------|--------------------------------------------------------|
| LMNA  | GGGGACAAGTTTGTACAAAAAAGCAGGCTTCatggagacccgtcccag | GGGGACCACTTTGTACAAGAAAGCTGGGTGcatgatgctcagttctgggg     |
| LMNB2 | GGGGACAAGTTTGTACAAAAAAGCAGGCTTCatgagcccgcgagcccc | GGGGACCACTTTGTACAAGAAAGCTGGGTGcatcacgtagcagcctcttgaggt |

## Supplementary References

- 1 Cowland, J. B., Wiborg, O. & Vuust, J. Human ubiquitin genes: one member of the UbB gene subfamily is a tetrameric non-processed pseudogene. *FEBS Lett* **231**, 187-191 (1988).
- 2 Brunet, M. A. *et al.* OpenProt: a more comprehensive guide to explore eukaryotic coding potential and proteomes. *Nucleic Acids Res* **47**, D403-D410, doi:10.1093/nar/gky936 (2019).
