# Supplementary material for: UBB pseudogene 4 encodes functional ubiquitin variants
Source: PubMed Central journal article supplement (PMC7066184; doi:10.1038/s41467-020-15090-6), 2020-03-11
Supplement: 41467_2020_15090_MOESM7_ESM.pdf [file 41467_2020_15090_MOESM7_ESM.pdf]

## Reporting Summary

Nature Research wishes to improve the reproducibility of the work that we publish. This form provides structure for consistency and transparency in reporting. For further information on Nature Research policies, see [Authors & Referees](#) and the [Editorial Policy Checklist](#).

### Statistics

For all statistical analyses, confirm that the following items are present in the figure legend, table legend, main text, or Methods section.

n/a Confirmed

- |                                     |                                     |                                                                                                                                                                                                                                                            |
|-------------------------------------|-------------------------------------|------------------------------------------------------------------------------------------------------------------------------------------------------------------------------------------------------------------------------------------------------------|
| <input type="checkbox"/>            | <input checked="" type="checkbox"/> | The exact sample size ( $n$ ) for each experimental group/condition, given as a discrete number and unit of measurement                                                                                                                                    |
| <input type="checkbox"/>            | <input checked="" type="checkbox"/> | A statement on whether measurements were taken from distinct samples or whether the same sample was measured repeatedly                                                                                                                                    |
| <input type="checkbox"/>            | <input checked="" type="checkbox"/> | The statistical test(s) used AND whether they are one- or two-sided<br><i>Only common tests should be described solely by name; describe more complex techniques in the Methods section.</i>                                                               |
| <input checked="" type="checkbox"/> | <input type="checkbox"/>            | A description of all covariates tested                                                                                                                                                                                                                     |
| <input type="checkbox"/>            | <input checked="" type="checkbox"/> | A description of any assumptions or corrections, such as tests of normality and adjustment for multiple comparisons                                                                                                                                        |
| <input type="checkbox"/>            | <input checked="" type="checkbox"/> | A full description of the statistical parameters including central tendency (e.g. means) or other basic estimates (e.g. regression coefficient) AND variation (e.g. standard deviation) or associated estimates of uncertainty (e.g. confidence intervals) |
| <input checked="" type="checkbox"/> | <input type="checkbox"/>            | For null hypothesis testing, the test statistic (e.g. $F$ , $t$ , $r$ ) with confidence intervals, effect sizes, degrees of freedom and $P$ value noted<br><i>Give <math>P</math> values as exact values whenever suitable.</i>                            |
| <input checked="" type="checkbox"/> | <input type="checkbox"/>            | For Bayesian analysis, information on the choice of priors and Markov chain Monte Carlo settings                                                                                                                                                           |
| <input checked="" type="checkbox"/> | <input type="checkbox"/>            | For hierarchical and complex designs, identification of the appropriate level for tests and full reporting of outcomes                                                                                                                                     |
| <input checked="" type="checkbox"/> | <input type="checkbox"/>            | Estimates of effect sizes (e.g. Cohen's $d$ , Pearson's $r$ ), indicating how they were calculated                                                                                                                                                         |

*Our web collection on [statistics for biologists](#) contains articles on many of the points above.*

### Software and code

Policy information about [availability of computer code](#)

|                 |                                                                                                                                                                                                                                                                                                                                |
|-----------------|--------------------------------------------------------------------------------------------------------------------------------------------------------------------------------------------------------------------------------------------------------------------------------------------------------------------------------|
| Data collection | Xcalibur version 2.2 SP1.48 was used for mass spectrometry acquisition of immunoprecipitations. PRM quantification data collection was done with Xcalibur version 3.1.66.10. LabSolution v5.93 software was used for acquisition by the Shimadzu LCMS-8060.                                                                    |
| Data analysis   | Identification and quantification of proteins identified by mass spectrometry was done using the MaxQuant software version 1.5.2.8. The quantification of nucleoli area was achieved with CellProfiler 3.1.8. FACS analysis was achieved with the FlowJo software 10.6.1. Statistical analysis was done with GraphPad Prism 8. |

For manuscripts utilizing custom algorithms or software that are central to the research but not yet described in published literature, software must be made available to editors/reviewers. We strongly encourage code deposition in a community repository (e.g. GitHub). See the Nature Research [guidelines for submitting code & software](#) for further information.

### Data

Policy information about [availability of data](#)

All manuscripts must include a [data availability statement](#). This statement should provide the following information, where applicable:

- Accession codes, unique identifiers, or web links for publicly available datasets
- A list of figures that have associated raw data
- A description of any restrictions on data availability

The mass spectrometry proteomics data have been deposited to the ProteomeXchange Consortium via the PRIDE partner repository with the dataset identifier PXD014318 (Figure 3).

## Field-specific reporting

Please select the one below that is the best fit for your research. If you are not sure, read the appropriate sections before making your selection.

Life sciences  Behavioural & social sciences  Ecological, evolutionary & environmental sciences

For a reference copy of the document with all sections, see [nature.com/documents/nr-reporting-summary-flat.pdf](https://www.nature.com/documents/nr-reporting-summary-flat.pdf)

## Life sciences study design

All studies must disclose on these points even when the disclosure is negative.

|                 |                                                                                                                                                                                                                                                                                                                 |
|-----------------|-----------------------------------------------------------------------------------------------------------------------------------------------------------------------------------------------------------------------------------------------------------------------------------------------------------------|
| Sample size     | Mass spectrometry data was performed in biological triplicates to allow statistical analyses (n=3). Growth curves were performed by FACS (n=4). Measurements of nucleoli was performed in biological triplicates (n=3). Minimal n=3 sizes were chosen when the data showed low variability between the samples. |
| Data exclusions | No data was excluded.                                                                                                                                                                                                                                                                                           |
| Replication     | Every other experiments in the article were performed at least twice, and all the findings were reproduced.                                                                                                                                                                                                     |
| Randomization   | Cells used for immunofluorescence imaging and measurements were selected randomly for the quantification of nucleoli size and lamin localization. There was no need for randomization.                                                                                                                          |
| Blinding        | Blinding was not possible as experimental conditions were evident from the image data and the initial observations were conclusive.                                                                                                                                                                             |

## Reporting for specific materials, systems and methods

We require information from authors about some types of materials, experimental systems and methods used in many studies. Here, indicate whether each material, system or method listed is relevant to your study. If you are not sure if a list item applies to your research, read the appropriate section before selecting a response.

### Materials & experimental systems

| n/a                                 | Involvement in the study                                  |
|-------------------------------------|-----------------------------------------------------------|
| <input type="checkbox"/>            | <input checked="" type="checkbox"/> Antibodies            |
| <input type="checkbox"/>            | <input checked="" type="checkbox"/> Eukaryotic cell lines |
| <input checked="" type="checkbox"/> | <input type="checkbox"/> Palaeontology                    |
| <input checked="" type="checkbox"/> | <input type="checkbox"/> Animals and other organisms      |
| <input checked="" type="checkbox"/> | <input type="checkbox"/> Human research participants      |
| <input checked="" type="checkbox"/> | <input type="checkbox"/> Clinical data                    |

### Methods

| n/a                                 | Involvement in the study                           |
|-------------------------------------|----------------------------------------------------|
| <input checked="" type="checkbox"/> | <input type="checkbox"/> ChIP-seq                  |
| <input type="checkbox"/>            | <input checked="" type="checkbox"/> Flow cytometry |
| <input checked="" type="checkbox"/> | <input type="checkbox"/> MRI-based neuroimaging    |

## Antibodies

### Antibodies used

- 1) GFP-Trap Agarose antibodies (Chromotek, gta-20).
- 2) anti-GFP (Roche #11814460001)
- 3) LaminA (Abcam #ab133256)
- 4) HA-tag (Invitrogen #26183)
- 5) Nucleolin (Abcam #136649)
- 6) Goat anti-mouse AlexaFluor 488 (Invitrogen #A11001)
- 7) Goat anti-rabbit AlexaFluor 546 (Invitrogen #A11008)
- 8) HA-tag (12CA5 monoclonal antibody, Hybridoma grown from ATCC)
- 9) actin antibody (Sigma #A5441)

### Validation

- 1) <https://chromotek.com/products/detail/product-detail/gfp-trap-agarose/>
- 2) Validated in WB and IP. Species are not relevant as this antibody recognizes a tag. Cited in 6 publication(s) in the manufacturer's application sheet.
- 3) Validated in WB, IHC, Flow Cyt, ICC/IF and tested in Mouse, Rat, Human. Cited in 4 publication(s).
- 4) Validated in WB, IHC, IP and ChIP. Species are not relevant as this is a tag. Cited in 29 publication(s).
- 5) Validated in WB, IHC, Flow Cyt, ICC/IF and tested in Mouse, Rat, Human. Cited in 86 publication(s).
- 6) Validated for immunofluorescence. Species are not relevant as this is a secondary antibody. Cited in 2981 publication(s) by the manufacturer.
- 7) Validated for immunofluorescence. Species are not relevant as this is a secondary antibody. Cited in 95 publication(s) by the manufacturer.

8) Validated for WB and IP. Species are not relevant as this is a tag. This is a historical hybridoma that has been used by thousands of laboratories. We grew the hybridoma, purified the antibody and tested the reactivity.

## Eukaryotic cell lines

Policy information about [cell lines](#)

|                                                                      |                                                             |
|----------------------------------------------------------------------|-------------------------------------------------------------|
| Cell line source(s)                                                  | HEK293, HeLa and U2OS are from ATCC.                        |
| Authentication                                                       | None of the cell lines used were authenticated.             |
| Mycoplasma contamination                                             | All cell lines were tested and are negative for mycoplasma. |
| Commonly misidentified lines<br>(See <a href="#">ICLAC</a> register) | Not applicable.                                             |

## Flow Cytometry

### Plots

Confirm that:

- The axis labels state the marker and fluorochrome used (e.g. CD4-FITC).
- The axis scales are clearly visible. Include numbers along axes only for bottom left plot of group (a 'group' is an analysis of identical markers).
- All plots are contour plots with outliers or pseudocolor plots.
- A numerical value for number of cells or percentage (with statistics) is provided.

### Methodology

|                           |                                                                                                                                                                                                                                                                                                                                                                                                                                                                                                                                                                                                                                                                                                                                                                               |
|---------------------------|-------------------------------------------------------------------------------------------------------------------------------------------------------------------------------------------------------------------------------------------------------------------------------------------------------------------------------------------------------------------------------------------------------------------------------------------------------------------------------------------------------------------------------------------------------------------------------------------------------------------------------------------------------------------------------------------------------------------------------------------------------------------------------|
| Sample preparation        | The control and KO cells lines were labeled with the cell proliferation tracer carboxyfluorescein succinimidyl ester (CFSE) (Biolegend). 125 000 cells were resuspended in 1ml PBS and 1ml of PBS containing 10M of CFSE was added. The cells were incubated at 37°C for 20 minutes and the incorporation was stopped by adding 10ml of complete DMEM as described above. Following centrifugation, the supernatant was removed and the cells were resuspended in complete DMEM, incubated for 10 minutes at room temperature and the cells were seeded in 60 mm dishes. At each time point (24, 48, 72 and 96 hours), the cells were harvested using 500ul of trypsin followed by two washes with ice-cold PBS. The cells were fixed in 100% ethanol and conserved at -20°C. |
| Instrument                | The quantification of CFSE was measured by flow cytometry (BD Fortessa cytometer, Becton Dickinson)                                                                                                                                                                                                                                                                                                                                                                                                                                                                                                                                                                                                                                                                           |
| Software                  | The analysis was achieved with the FlowJo software (LLC).                                                                                                                                                                                                                                                                                                                                                                                                                                                                                                                                                                                                                                                                                                                     |
| Cell population abundance | Not for CFSE cell count, as this is not a cell population distribution.                                                                                                                                                                                                                                                                                                                                                                                                                                                                                                                                                                                                                                                                                                       |
| Gating strategy           | Figure 4d includes an exemple of the gating strategy and the boundaries are described in the figure legend.                                                                                                                                                                                                                                                                                                                                                                                                                                                                                                                                                                                                                                                                   |

Tick this box to confirm that a figure exemplifying the gating strategy is provided in the Supplementary Information.
